# Supplementary material
Source: PubMed Central journal article supplement (PMC8339569)
Supplement: mmc1.pdf [file mmc1.pdf]

## Supplementary Material

**Title:** Prevalence of SARS-CoV-2 IgG antibodies and their association with clinical symptoms of COVID-19 in Estonia (KoroSero-EST-1 study)

**Journal:** Vaccine

**Authors:** Piia Jõgi<sup>1,2</sup>, Hiie Soeorg<sup>3</sup>, Diana Ingerainen<sup>4</sup>, Mari Soots<sup>5</sup>, Freddy Lättekivi<sup>6,7</sup>, Paul Naaber<sup>3,8</sup>, Karolin Toompere<sup>9</sup>, Pärt Peterson<sup>10</sup>, Liis Haljasmägi<sup>10</sup>, Eva Žusinaite<sup>11</sup>, Hannes Vaas<sup>1</sup>, Merit Pauskar<sup>3</sup>, Arina Shablinskaja<sup>3</sup>, Katrin Kaarna<sup>7,12</sup>, Heli Paluste<sup>13</sup>, Kai Kisand<sup>10</sup>, Marje Oona<sup>14</sup>, Riina Janno<sup>7</sup>, Irja Lutsar<sup>3</sup>

**Corresponding author:** Piia Jõgi

**Corresponding author affiliation:** Children's Clinic of Tartu University Hospital, N. Lunini 6, 50406, Tartu, Estonia; Department of Pediatrics, Institute of Clinical Medicine, University of Tartu, L. Puusepa 8, 50406, Tartu, Estonia

**Corresponding author email:** piia.jogi@kliinikum.ee

## Supplementary Content 1. Study questionnaire

### 1. Personal data

|      |                                          |  |
|------|------------------------------------------|--|
| 1.1. | First name                               |  |
| 1.2. | Family name                              |  |
| 1.3. | Patient ID                               |  |
| 1.4. | Age (in years)                           |  |
| 1.5. | Phone number                             |  |
| 1.6. | E-mail                                   |  |
| 1.7. | Place of residence (county)              |  |
| 1.8. | Number of family members living together |  |
| 1.9. | Form completion date (dd/mm/yyyy)        |  |

### 2. History of COVID-19

|                                                                  | Yes | No |
|------------------------------------------------------------------|-----|----|
| 2.1. Have you had acute respiratory illness since March 1, 2020? |     |    |

2.1.1. If Yes, then date of becoming ill? ...../...../..... (dd/mm/yyyy)

|                                                                                            | Yes | No |
|--------------------------------------------------------------------------------------------|-----|----|
| 2.2. Have you had a COVID-19 PCR test (nasal swab)?                                        |     |    |
| 2.2.1. If Yes, then did the PCR test confirm COVID-19 infection?                           |     |    |
| 2.3. Have you been in contact with someone who has been diagnosed with COVID-19 infection? |     |    |

2.3.1. If Yes, then date of the last contact? ...../...../..... (dd/mm/yyyy)

|                                                                  | Yes | No | Not sure |
|------------------------------------------------------------------|-----|----|----------|
| 2.4. Have you been vaccinated against tuberculosis in childhood? |     |    |          |

### 3. Symptom history (only for those who answered Yes in 2.1)

|                                 | Yes | No |
|---------------------------------|-----|----|
| Fever $\geq 38^{\circ}\text{C}$ |     |    |
| Chills                          |     |    |
| Fatigue                         |     |    |
| Muscle aches                    |     |    |
| Sore throat                     |     |    |
| Cough                           |     |    |
| Runny nose                      |     |    |
| Difficulty breathing            |     |    |
| Shortness of breath             |     |    |
| Chest pain                      |     |    |
| Other respiratory symptoms      |     |    |
| Headache                        |     |    |
| Nausea/vomiting                 |     |    |

|                                                                  |  |  |
|------------------------------------------------------------------|--|--|
| Stomach ache                                                     |  |  |
| Diarrhea                                                         |  |  |
| Did any of these symptoms require you to seek medical attention? |  |  |
| Did any of these symptoms require you to miss work?              |  |  |
| Did any of these symptoms require you to be hospitalized?        |  |  |

**Supplementary Table S1.** Seroprevalence and seroprevalence adjusted for test performance according to age groups and confidence interval

| <b>Age group (years)</b> | <b>Seroprevalence,<br/>% (95% CI)</b> | <b>Seroprevalence adjusted for test<br/>performance, % (95% CI)</b> |
|--------------------------|---------------------------------------|---------------------------------------------------------------------|
| <b>Tallinn</b>           |                                       |                                                                     |
| 0-9                      | 3.8 (1-9.4)                           | 4.0 (0.8-8.1)                                                       |
| 10-19                    | 0 (0-3.4)                             | 0.0 (0-0)                                                           |
| 20-29                    | 0.9 (0-4.9)                           | 0.9 (0-2.9)                                                         |
| 30-39                    | 0.9 (0-4.7)                           | 0.8 (0-2.8)                                                         |
| 40-49                    | 1.7 (0.2-5.9)                         | 1.7 (0-4.5)                                                         |
| 50-59                    | 1.7 (0.2-6)                           | 1.7 (0-4.6)                                                         |
| 60-69                    | 2.6 (0.5-7.4)                         | 2.7 (0-6.3)                                                         |
| 70-79                    | 0 (0-3.2)                             | 0.0 (0-0)                                                           |
| 80-100                   | 1 (0-5.6)                             | 1.0 (0-3.3)                                                         |
| <b>Saaremaa</b>          |                                       |                                                                     |
| 0-9                      | 5.9 (2.2-12.5)                        | 6.3 (2-11.7)                                                        |
| 10-19                    | 5.5 (2-11.5)                          | 5.8 (1.8-10.7)                                                      |
| 20-29                    | 5.8 (2.1-12.1)                        | 6.1 (1.9-11.4)                                                      |
| 30-39                    | 7.4 (3.5-13.7)                        | 7.9 (3.4-13.4)                                                      |
| 40-49                    | 7 (3.1-13.4)                          | 7.5 (2.7-13)                                                        |
| 50-59                    | 7.1 (3.1-13.5)                        | 7.5 (2.8-13.1)                                                      |
| 60-69                    | 5.4 (2-11.3)                          | 5.7 (1.7-10.6)                                                      |
| 70-79                    | 3.6 (1-8.9)                           | 3.7 (0.7-7.8)                                                       |
| 80-100                   | 9 (3.4-18.5)                          | 9.6 (3.1-17.6)                                                      |

CI – confidence interval

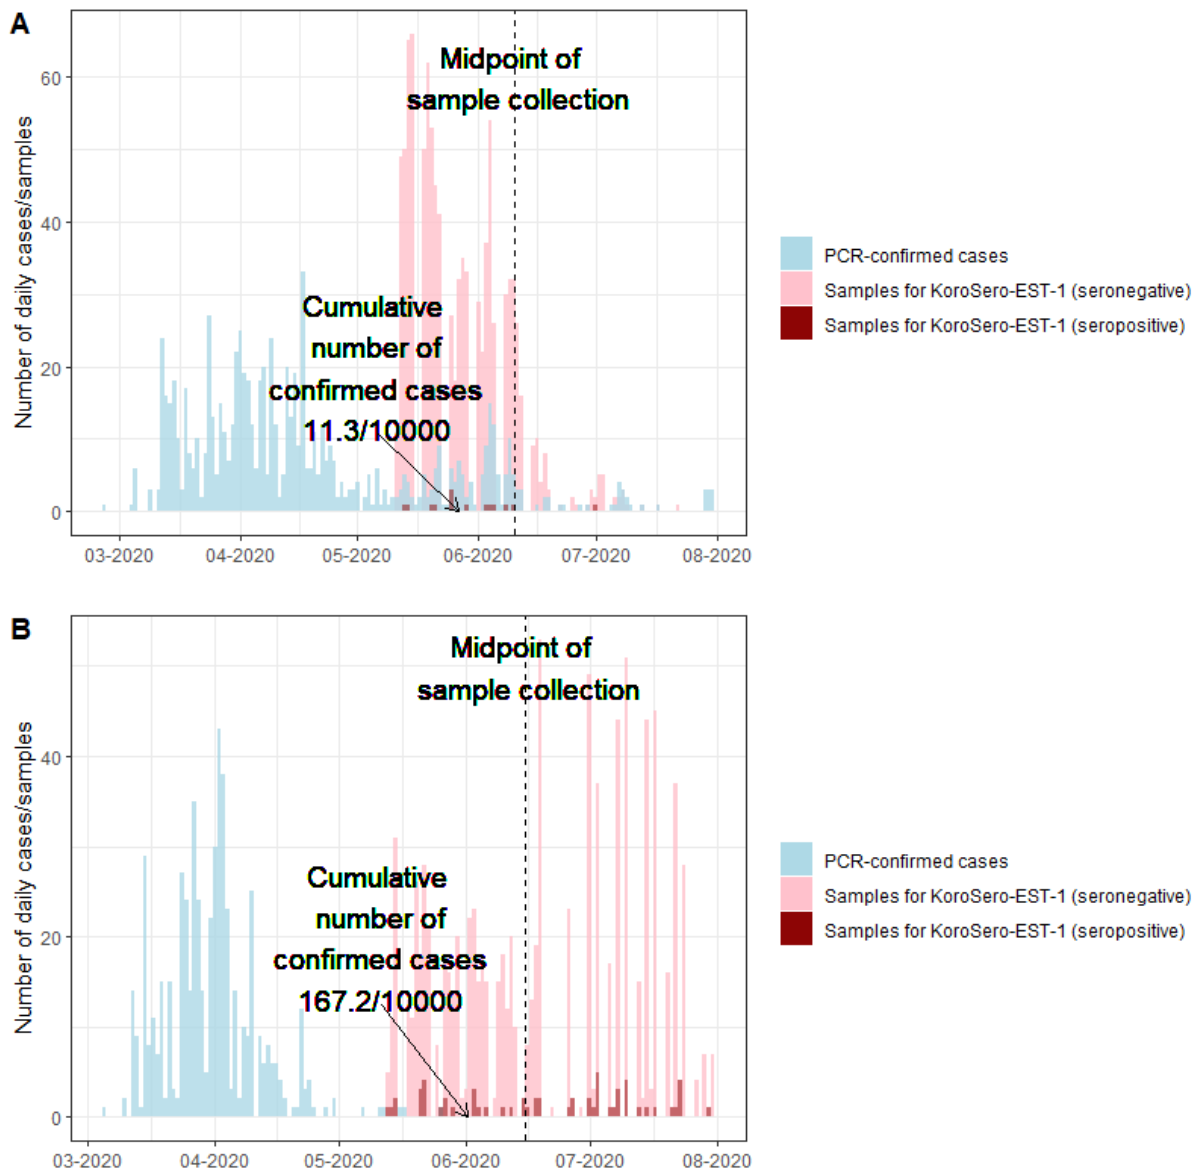

**Supplementary Figure S1.** PCR-confirmed cases (blue) and number of seropositive (dark red) or seronegative (pink) serum samples drawn for the seroepidemiological study KoroSero-EST-1 (A) in Tallinn and (B) in Saaremaa

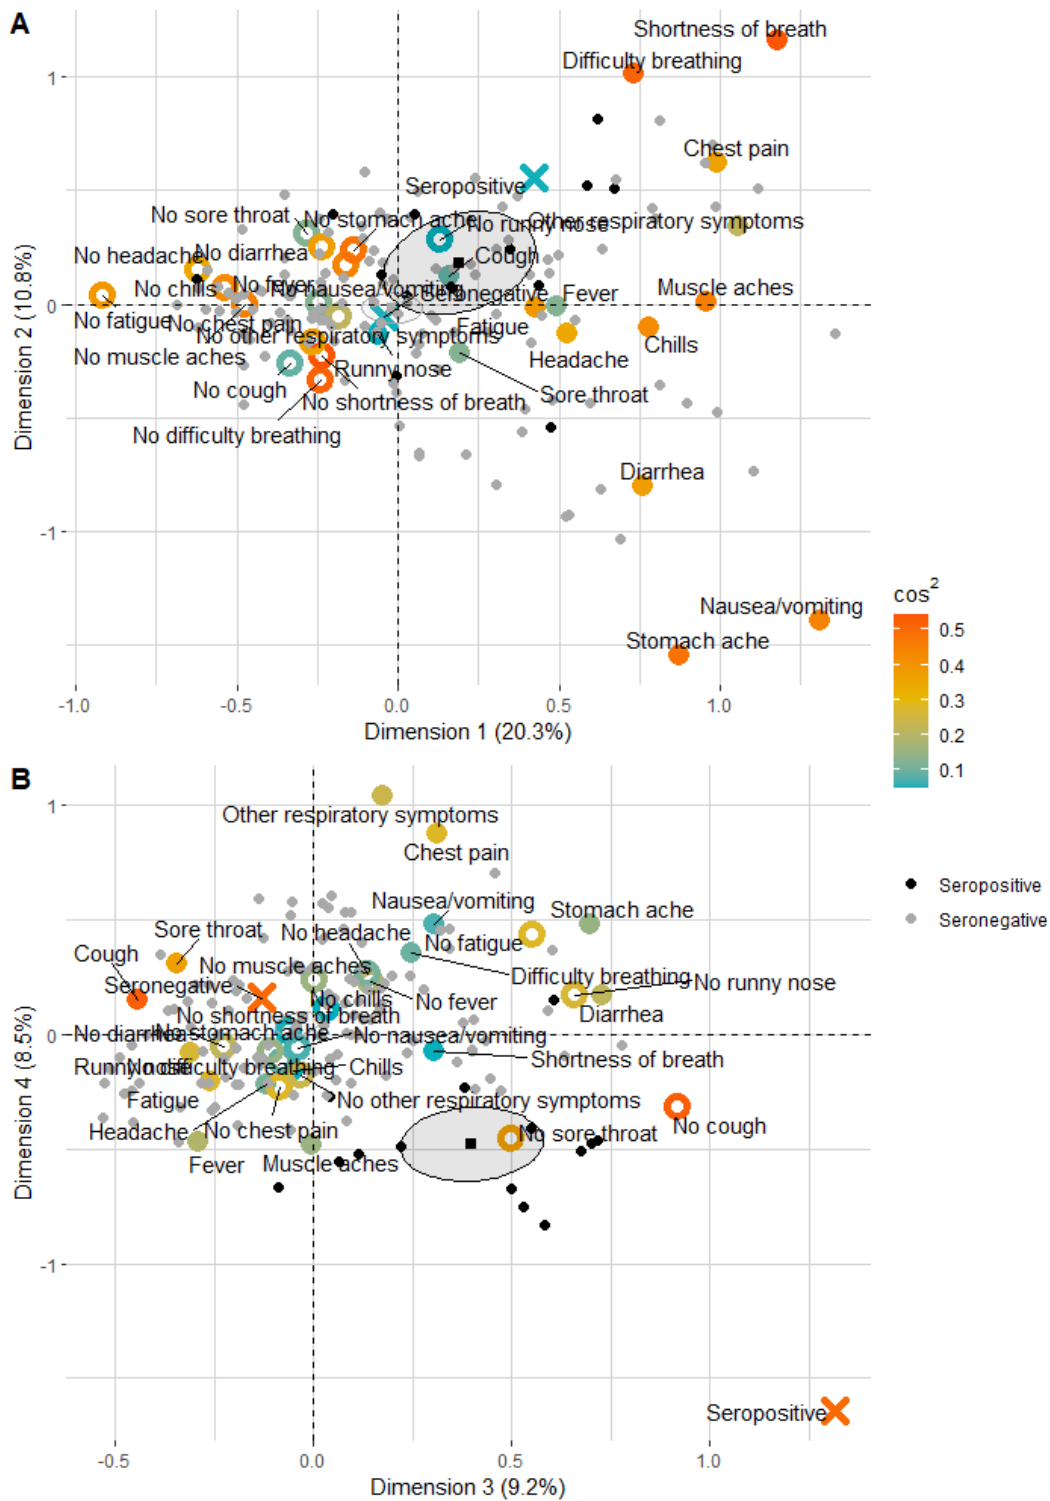

**Supplementary Figure S2.** Biplot of the dimensions (A) 1 and 2 and (B) 3 and 4 of multiple correspondence analysis on association between the presence (filled large dots) or absence (empty large dots) of symptoms and seropositivity (crosses) in all individuals with acute respiratory illness. The variables included in the analysis are colored according to the sum of  $\cos^2$  of the variable on dimensions 1 and 2 or 3 and 4 on panels A and B, respectively. Grey and black small dots represent seronegative and seropositive individuals, respectively. Practices of gravity of seropositive and seronegative patients are shown by squares surrounded by 95% confidence ellipses. According to dimensions three and four seropositivity was associated with the absence of cough and the absence of sore throat

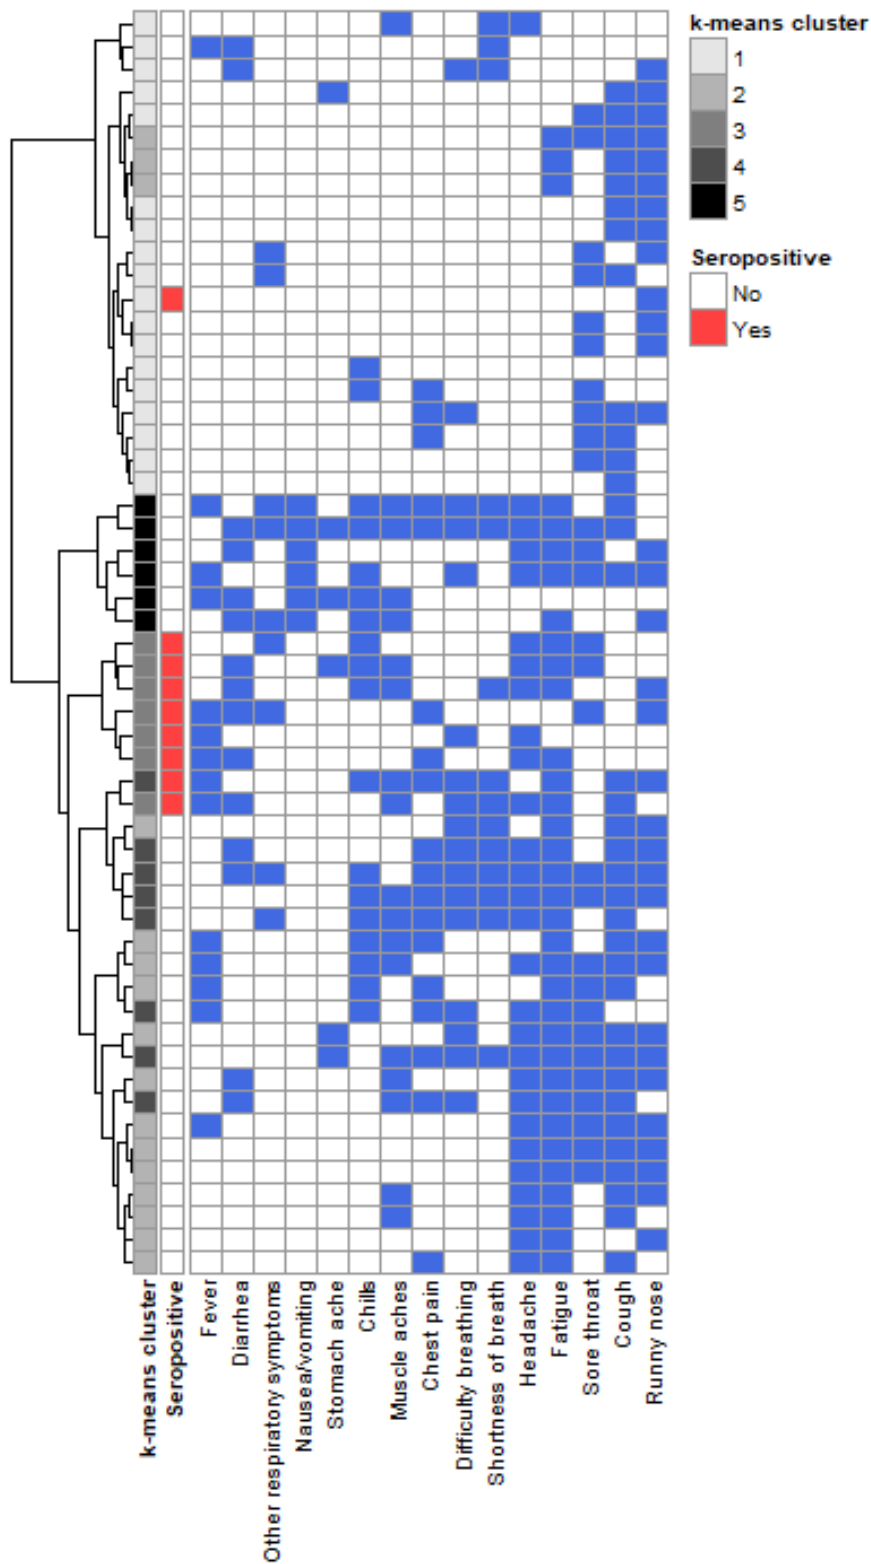

**Supplementary Figure S3.** Clustering of individuals aged 50 years or more with acute respiratory illness according to hierarchical clustering on components of multiple correspondence analysis and subsequent k-means consolidation into 5 groups (leftmost column, designated with different shades of grey). Seropositivity is shown in the second leftmost column in red. The presence of the respective symptom is indicated in blue. The majority (7/9) of seropositive individuals are grouped into a single k-means cluster containing no seronegative individuals.
